# Supplementary material for: Lamotrigine Reduces Inflammatory Response and Ameliorates Executive Function Deterioration in an Alzheimer’s-Like Mouse Model
Source: Hindawi journal article supplement (doi:10.1155/2016/7810196), 2016-01-01
Supplement: f1 [file 7810196.f1.pdf]

Supplementary Fig. 1

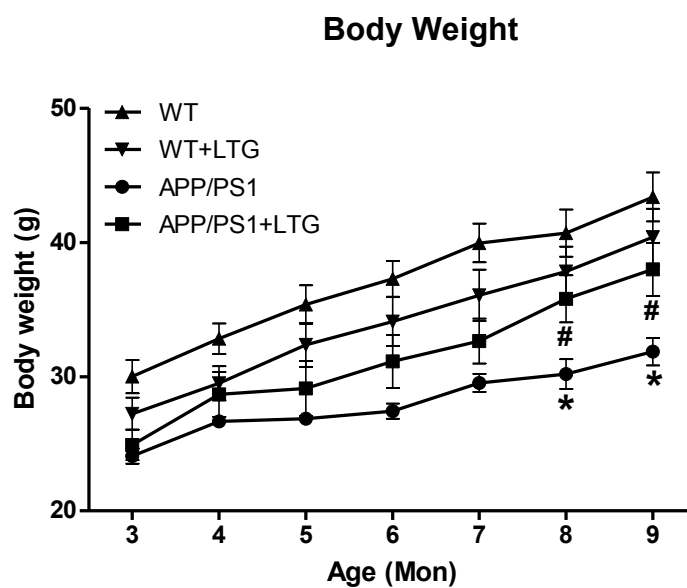

The body weight of each group were measured bi-weekly and analyzed here monthly. A significant lower weight gain was observed in the 8- and 9- month old APP/PS1 mice ( $p < 0.01$  vs WT) but LTG treatment (APP/PS1+LTG) could result in an increase of body weight gain in the APP/PS1 mice ( $p < 0.01$  vs APP/PS1).  $n = 7-15$  in each group

**Supplementary Fig. 2**

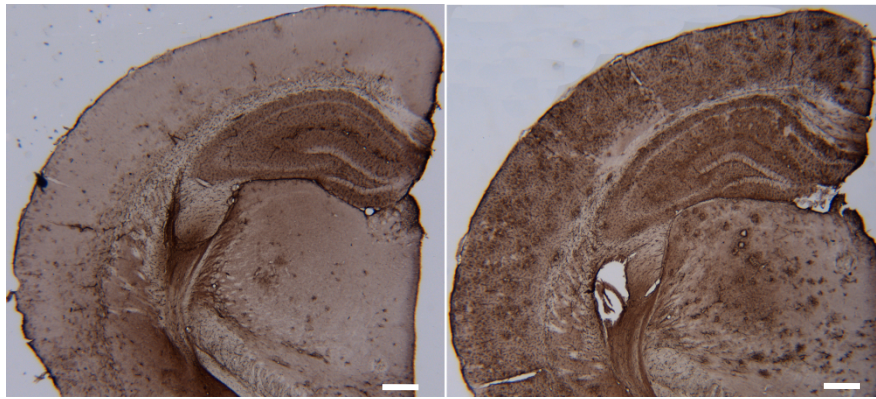

**WT**

**APP/PS1**

GFAP staining in WT and APP/PS1 mouse brain section. Scale bar =500  $\mu$ m

**Supplementary Fig. 3**

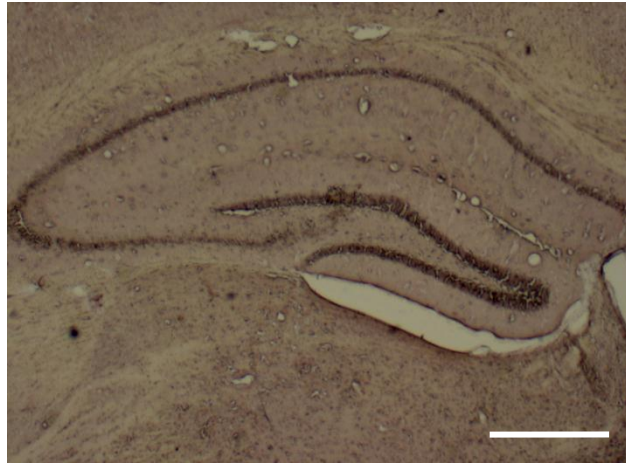

**WT**

Congo Red staining in WT mouse brain section. Scale bar =500  $\mu$ m
